# Supplementary material for: The GPS Motif Is a Molecular Switch for Bimodal Activities of Adhesion Class G Protein-Coupled Receptors
Source: PubMed Central journal article supplement (PMC3776922; doi:10.1016/j.celrep.2012.06.015), 2012-08-30
Supplement: mmc2.pdf [file mmc2.pdf]

Table S2. Genetic Conservation of GPS: Comparison of Ka/Ks ratios, Related to Figure S4

| <b>Receptor</b> | <b>with HX(S/T)</b> | <b>without HX(S/T)</b> |
|-----------------|---------------------|------------------------|
| <i>Celsr1</i>   | 0.1399              | 0.12274 <sup>#</sup>   |
| <i>Celsr2</i>   | 0.0337 <sup>*</sup> | 0.03635 <sup>#</sup>   |
| <i>Lphn2</i>    | 0.0163 <sup>§</sup> | 0.01641                |

The evolutionary conservation of the GPS with and without the potential cleavage sequence (HX(S/T)) was compared between orthologs of *Celsr1*, *Celsr2*, and *Lphn2*. The analysis included the coding region of the GPS of *Celsr1*, *Celsr2* and *Lphn2* from 17 vertebrate orthologs (sequences are provided on request). Low Ka/Ks values of the GPS-coding sequences indicate strong purifying (negative or sequence-keeping) selection in all aGPCR investigated. Although there are significant differences of conservation between cleavable (*Celsr2*, *Lphn2*) and non-cleavable (*Celsr1*) GPS (\**Celsr2* versus *Celsr1*:  $p < 10^{-17}$ ; §*Lphn2* versus *Celsr1*:  $p < 10^{-26}$ ), the cleavage sites (<sup>#</sup>with HX(S/T) versus without HX(S/T):  $p < 10^{-6}$ ) do not contribute to the overall differences in GPS conservations between the aGPCR investigated. Note: no (*Lphn2*) or opposite directions of differences in HXS/T versus without HX(S/T) (*Celsr1*, *Celsr2*) were found.
